# Supplementary material for: Single-molecule quantification of photoredox activities and dynamics at the nanoscale on multi-faceted 2D materials
Source: Royal Society of Chemistry journal article supplement (doi:10.1039/d4ta07149b), 2025-01-01
Supplement: d4ta07149b1.pdf [file d4ta07149b1.pdf]

# Supporting Information

## Single-molecule quantification of photoredox activities and dynamics at the nanoscale on multi- faceted 2D materials

Shuyang Wu, Jinn-Kye Lee, Mingyu Ma, Jia Xin Chan, Zhengyang Zhang\*

School of Chemistry, Chemical Engineering and Biotechnology, Nanyang Technological  
University, 21 Nanyang Link, Singapore 637371.

Corresponding Author

E-mail: zhang.zy@ntu.edu.sg

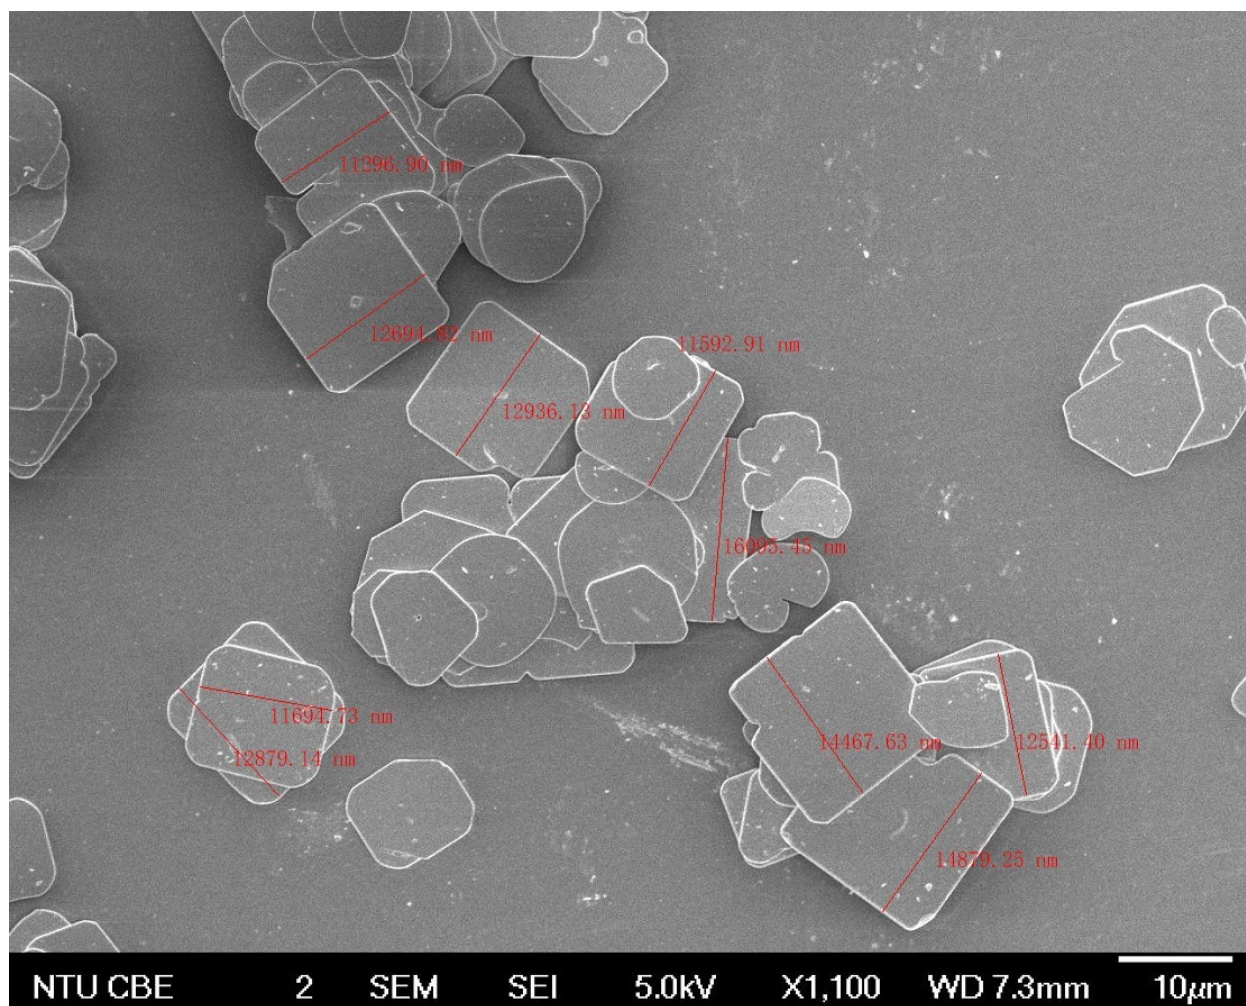

17

18 **Fig. S1** The FESEM image of BiOBr-001 with lateral size measured.

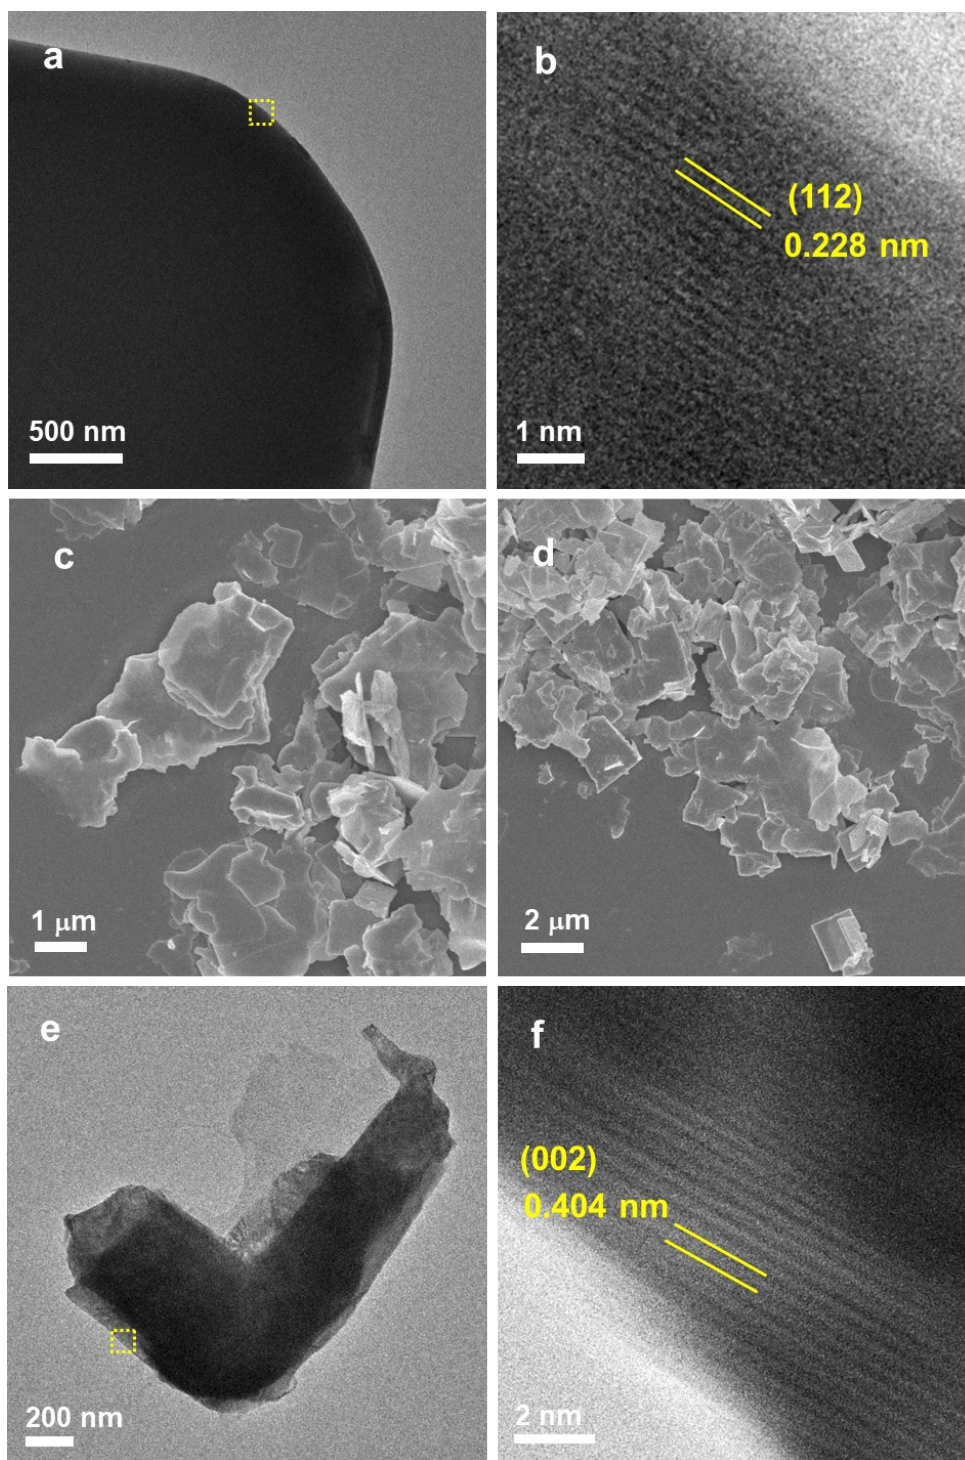

19

20 **Fig. S2** (a) TEM and (b) HRTEM images of BiOBr-001. (c, d) FESEM, (e) TEM, (f) HRTEM  
 21 images of BiOBr-010. (b) and (f) are the close-up of the regions in the marked areas in (a) and (e),  
 22 respectively.

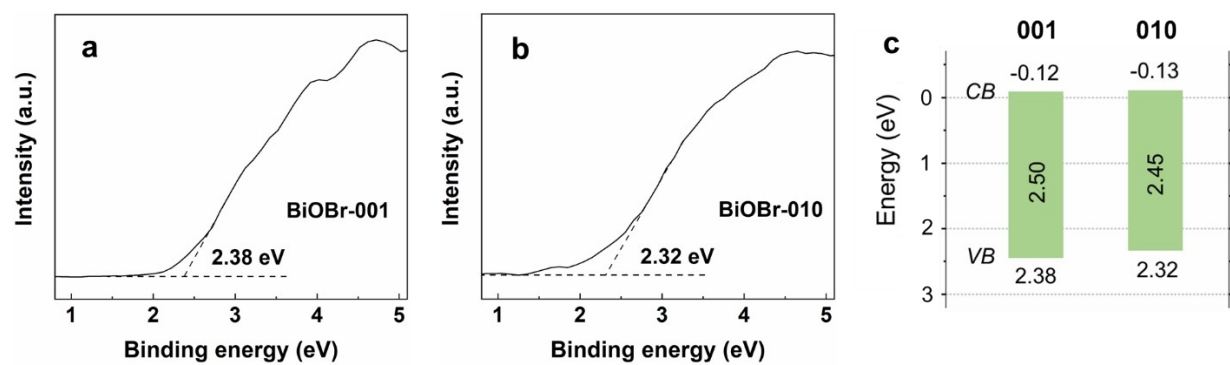

23

24 **Fig. S3** UPS spectra of (a) BiOBr-001 and (b) BiOBr-010. (c) Band structure diagrams of BiOBr  
 25 samples.

26

## 27 The principles of SMF imaging of photoredox reactions on BiOBr

28 To explore charge distribution and photocatalytic heterogeneity at the nanoscale, the SMF  
29 technique was employed to visualize the fluorogenic reactions of resazurin photoreduction and  
30 amplex red photo-oxidation (**Fig. 2c**). The localization of  $e^-$  is achieved through the photoreduction  
31 of non-fluorescent resazurin into fluorescent resorufin.<sup>1</sup> The photogenerated  $h^+$  are detected  
32 indirectly by oxidizing amplex red to resorufin via hydroxyl radicals ( $\bullet OH$ ), which are formed  
33 through the reaction of  $h^+$  with adsorbed water.<sup>2</sup> As a result, the fluorescence bursts observed in  
34 the SMF images represent single catalytic turnover events, where individual fluorescent molecules  
35 are produced at distinct catalytic sites (**Fig. 2d**). In the intensity trajectory (**Fig. 2e**), the waiting  
36 time before each resorufin molecule forms is denoted as  $\tau_{off}$ , while  $\tau_{on}$  represents the time during  
37 which resorufin remains at the reactive sites. These events are stochastic single-turnover events,  
38 evidenced by the one-step on/off variation in the fluorescence trajectory (**Fig. 2e**). By tracking  
39 abundant catalytic events, frames containing single-turnover events are reconstructed and  
40 analyzed. In **Fig. S4**, the intensity profile of a resorufin molecule from **Fig. 2d** (highlighted by the  
41 cyan square) is depicted as a point spread function spanning multiple pixels. The intensity of the  
42 point spread function is fitted to a 2D elliptical Gaussian function, which is used to pinpoint the  
43 centers of fluorescent bursts (**Fig. S4**) based on **eqn S1**. According to **eqn S1-S3**, the average  
44 localization precision is determined to be 20 nm. The exceptional spatial resolution and high  
45 signal-to-noise ratio of the images are attributed to the merits of TIRF microscopy. This imaging  
46 method improves photon collection through a high numerical aperture while simultaneously  
47 minimizing background noise.



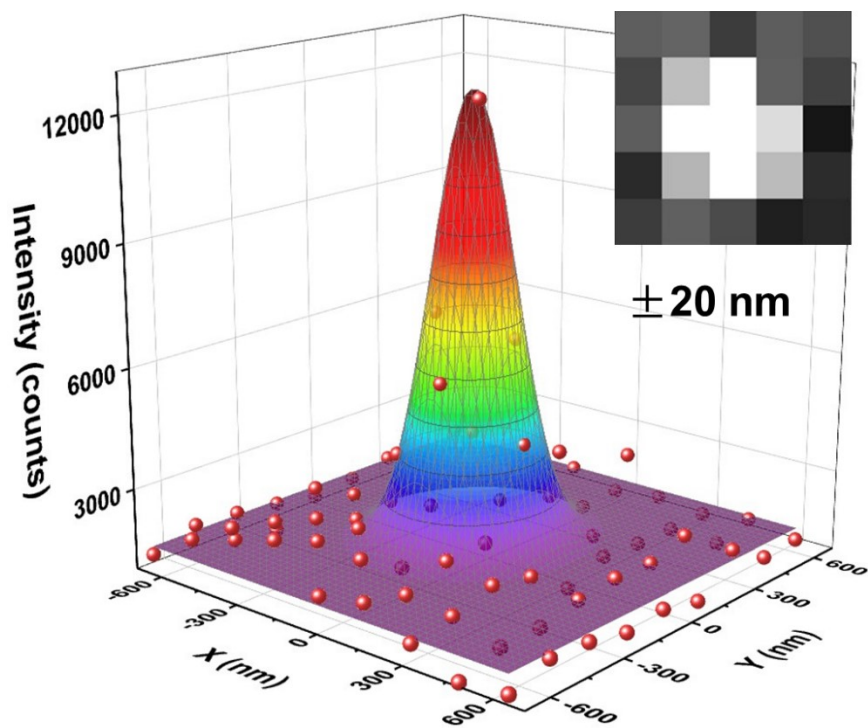

48

49 **Fig. S4** 2D Gaussian fitted distribution of fluorescence intensity of the product molecule in the  
 50 inset, acquired from the cyan square in **Fig. 2d**.

51

52 **Determine single-molecule catalytic turnovers with nanometer resolution.**

53 As shown in **Fig. S4**, the fluorescence intensity spreads across several pixels forming a point  
54 spread function. In short, the resolution can be calculated using the approach discussed in previous  
55 research.<sup>3,4</sup> **Fig. S4** shows that the center position is determined by fitting the intensity data to 2D  
56 elliptical Gaussian functions (**eqn S1**):

57 
$$I(x,y) = A + B * \exp\left(-\left(\frac{(x-x_0)^2}{2S_x^2} + \frac{(y-y_0)^2}{2S_y^2}\right)\right) \quad (\text{S1})$$

58 where  $(x_0, y_0)$  represents the center position, A denotes the background level, B is the peak  
59 intensity at  $(x_0, y_0)$ ,  $S_x$  and  $S_y$  correspond to the standard deviations of the Gaussian distribution  
60 along the x- and y-axes, respectively. The localization accuracy ( $\sigma_j, j=x, y$ ) is determined by the  
61 pixel size of the camera, the number of photons collected and the background noise level as  
62 described in **eqn S2**:

63 
$$\sigma_j = \sqrt{\left(\frac{S_j^2}{N} + \frac{a^2/12}{N} + \frac{8\pi S_j^4 b^2}{a^2 N^2}\right)} \quad (\text{S2})$$

64 where represents the number of photons collected,  $a$  is the pixel size, and  $b$  denotes the  
65 background noise in terms of photons. For the fluorescent burst shown in **Fig. S4**, the parameters  
66 are calculated to be  $S_x = 112$  nm,  $S_y = 120$  nm,  $a = 160$  nm,  $N = 530$  and  $b = 24$ . As a result,  $\sigma_x = 19$   
67 nm and  $\sigma_y = 21$  nm are determined. The overall localization accuracy (resolution) is calculated to  
68 be  $\sigma_{xy} = 20$  nm using **eqn S3**:

69 
$$\sigma_{xy} = (\sigma_x + \sigma_y)/2 \quad (\text{S3})$$

70

## 71 **Image segmentation.**

72 To quantify the structure-dependent photoactivities and dynamics, image segmentation was  
73 performed to define the size of the reaction subregions at each structure (**Fig. S5** and **S6**).  
74 Typically, the dimension of the reaction unit area can be determined by analyzing the intensity-  
75 position profile.<sup>3</sup> As highlighted by the marked rectangle in **Fig. S5a**, **Fig. S5b** shows the cross-  
76 sectional profile of the BiOBr-001 nanoplate when using resazurin. The profile is fitted with a  
77 Gaussian function to determine the full width at half maximum (FWHM). The FWHM for BiOBr-  
78 001 with resazurin and amplex red is calculated to be 157 nm and 180 nm, respectively (**Fig.**  
79 **S5b,d**). Similarly, the BiOBr-010 sample with resazurin and amplex red shows FWHM values of  
80 156 nm and 164 nm, respectively (**Fig. S6b,d**). These values are approximately the size of one  
81 pixel (160 nm). Consequently, the BiOBr samples were divided into multiple subregions of  $1 \times 1$   
82 pixels (160 nm  $\times$  160 nm). We ensured that each subregion contained only one fluorescent burst;  
83 otherwise, the subregion size is reduced to meet this criterion.



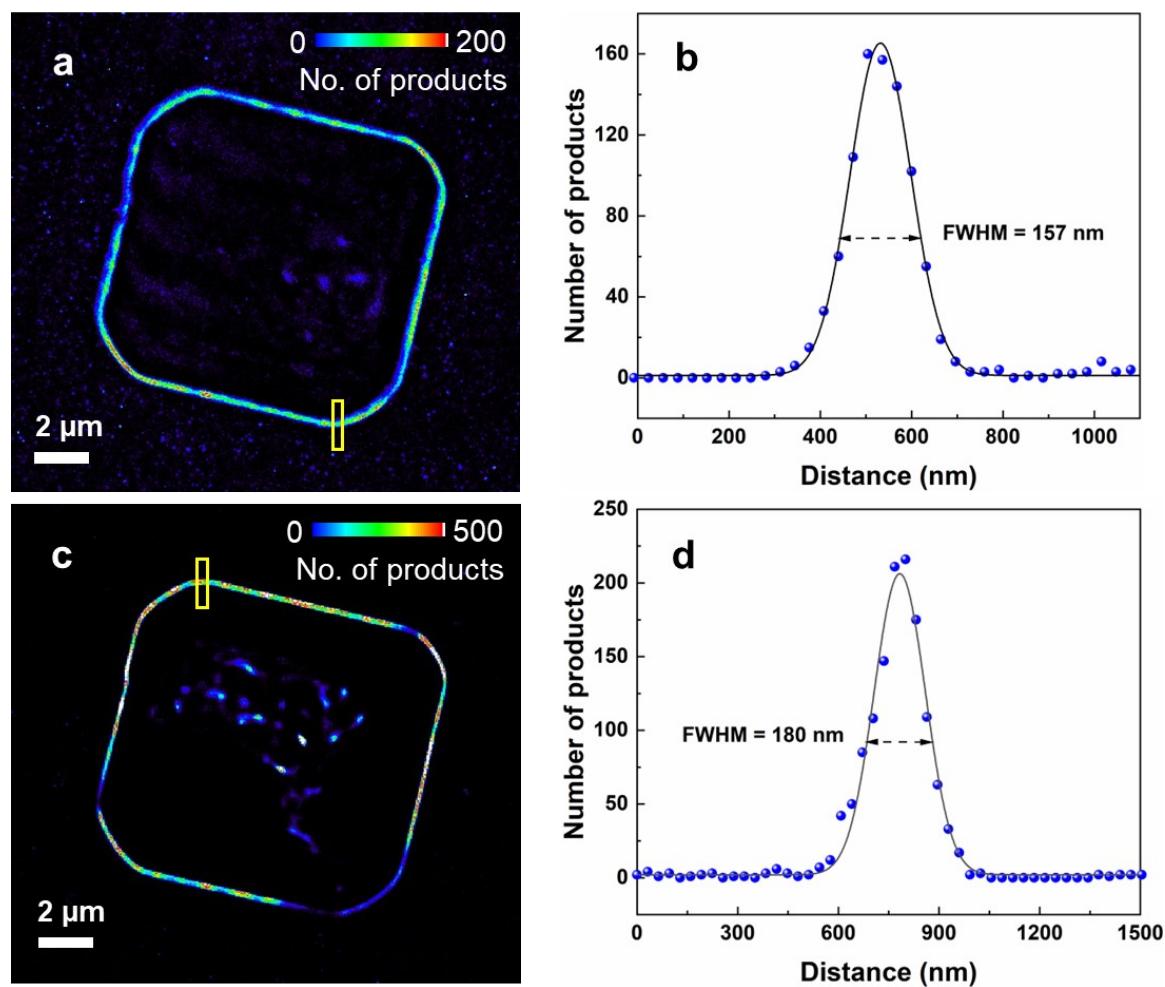

84

85 **Fig. S5** Image segmentation of BiOBr-001 for (a) resazurin photoreduction and (c) amplex red  
 86 photo-oxidation in the density map. (b, d) Cross-profile plots of fluorescence intensity on BiOBr-  
 87 001 marked in (a) and (c), respectively.

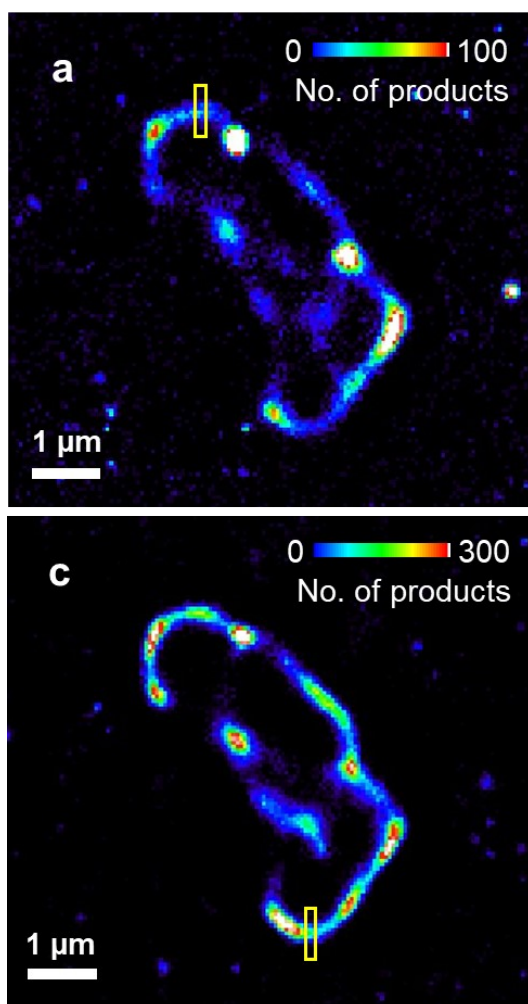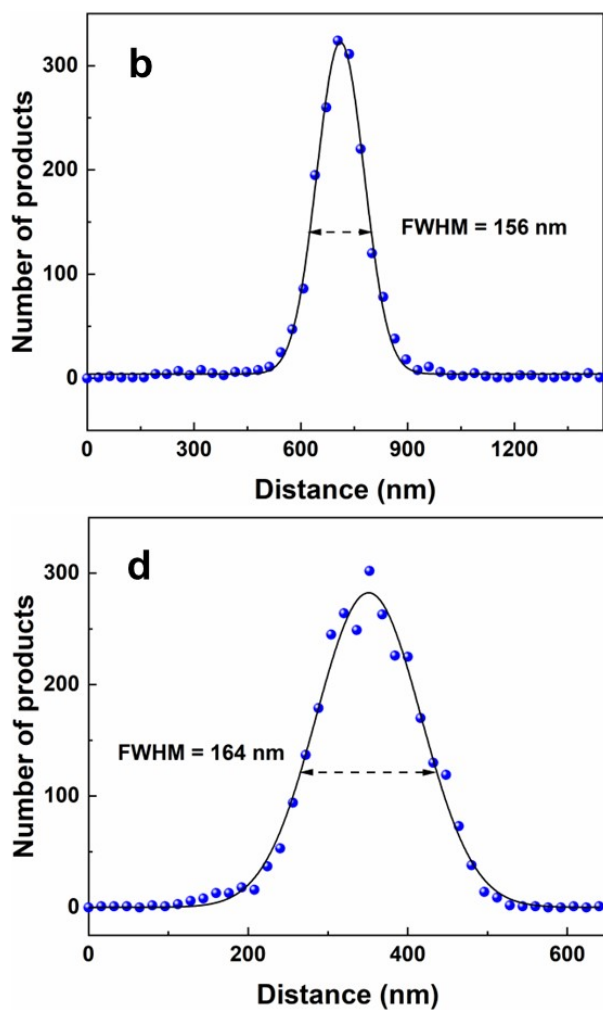

88

89 **Fig. S6** Image segmentation of BiOBr-010 for (a) resazurin photoreduction and (c) amplex red  
 90 photo-oxidation in the density map. (b, d) Cross-profile plots of fluorescence intensity on BiOBr-  
 91 010 marked in (a) and (c), respectively.

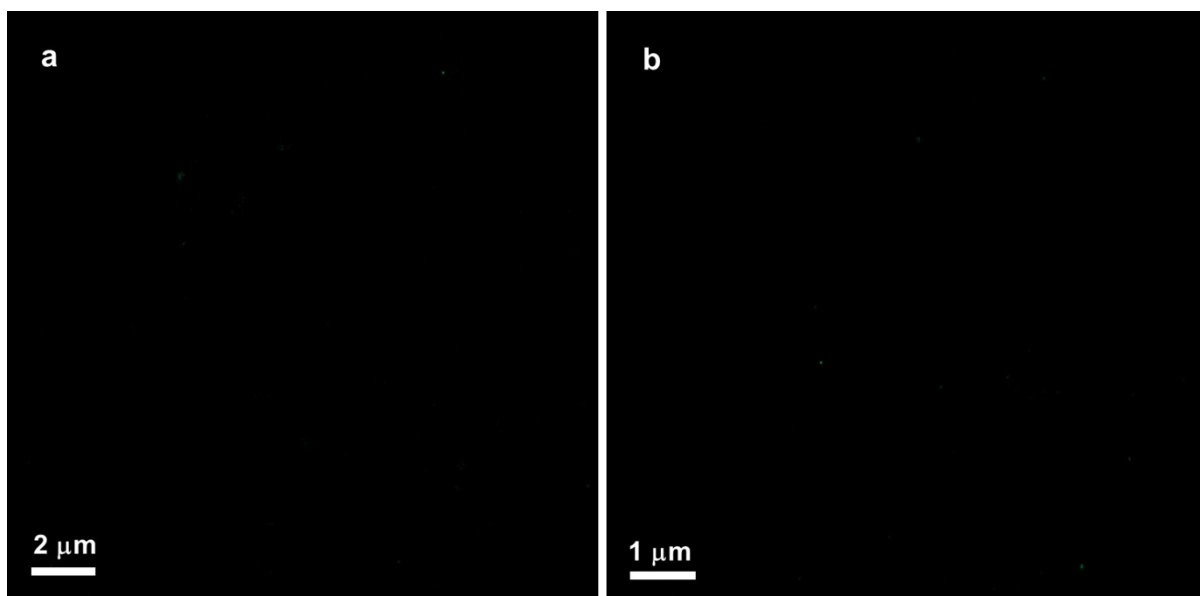

92

93 **Fig. S7** The SMF images of (a) BiOBr-001 and (b) BiOBr-010 after being washed with DI water  
 94 and photobleached for 30 min after the photoreaction.

95

96

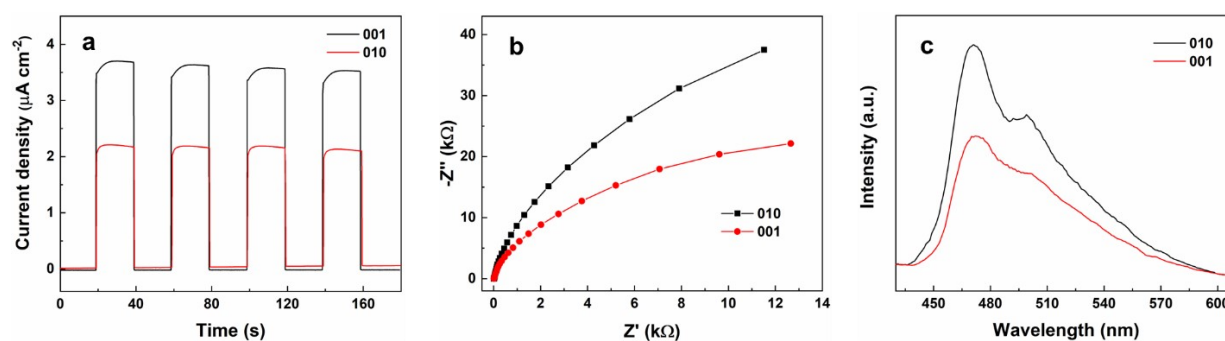

97

98 **Fig. S8** (a) Transient photocurrent density, (b) EIS spectra (300 W Xe lamp,  $> 400$  nm) and (c) PL  
 99 spectra of BiOBr nanoplates.

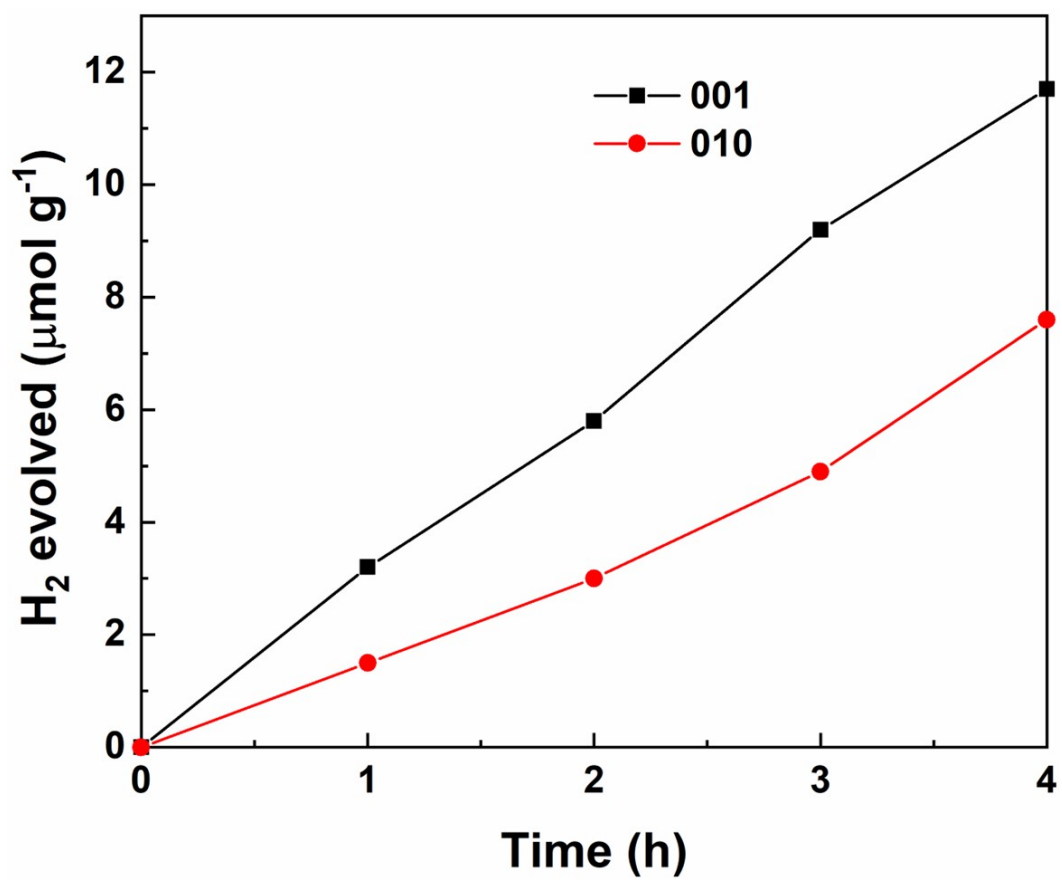

100

101 **Fig. S9** Photocatalytic H<sub>2</sub> generation on BiOBr nanoplates (100 mg of photocatalysts, no Pt  
 102 cocatalysts, 10 vol% TEOA, 300 W Xe lamp, > 400 nm).

### 103 The SMF study of temporal activity fluctuations on BiOBr.

104 The calculated decay constants for  $C_{\tau_{\text{off}}-m}$  (Fig. S11a) and  $C_{\tau_{\text{on}}-m}$  (Fig. S11b) are determined  
105 to be  $m_{\text{off}} = 0.81$  and  $m_{\text{on}} = 1.41$  turnovers, with an average turnover time of 0.33 s for this trajectory.  
106 Accordingly, the fluctuation correlation times for  $\tau_{\text{off}}$  and  $\tau_{\text{on}}$  reactions are determined to be 0.27 s  
107 and 0.47 s, respectively. These correlation times reflect the fluctuation timescales in the catalytic  
108 reaction and indirect product dissociation, which are predominant at the saturated [S] (1  $\mu\text{M}$ ).  
109 Temporal fluctuations in activity are linked to small-scale dynamic surface restructuring at the  
110 nanoscale. This could change the conversion rate constant ( $k_{\text{eff}} = kn_r$ ) by altering the reactivity at  
111 individual catalytic sites and the number of active sites for  $\tau_{\text{off}}$  reactions. Similarly, it also changes  
112 the rate constants of direct and indirect dissociation for  $\tau_{\text{on}}$  reactions. Both will result in temporal  
113 variations in activity and oscillatory dynamics. This behavior is driven by distinct adsorbate-  
114 surface interactions at each site, which are influenced by [S].<sup>5</sup>

115

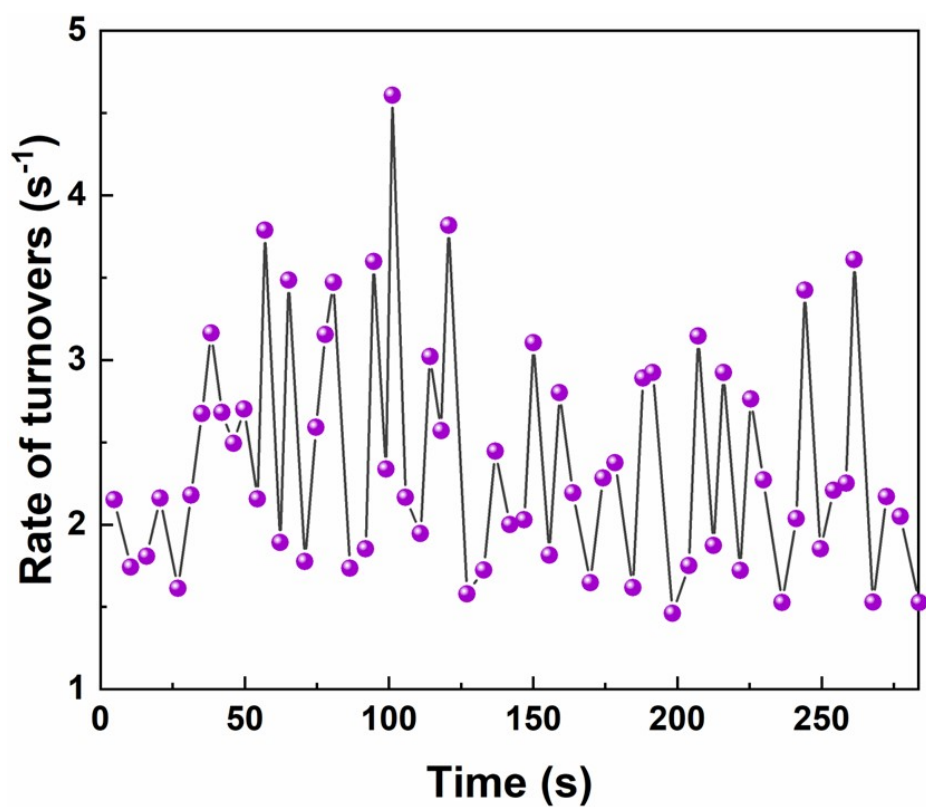

116

117 **Fig. S10** A typical trajectory of rate of turnovers on BiOBr-001 edges with 1  $\mu$ M resazurin. Each  
 118 data point is calculated based on every 10 turnovers.

119

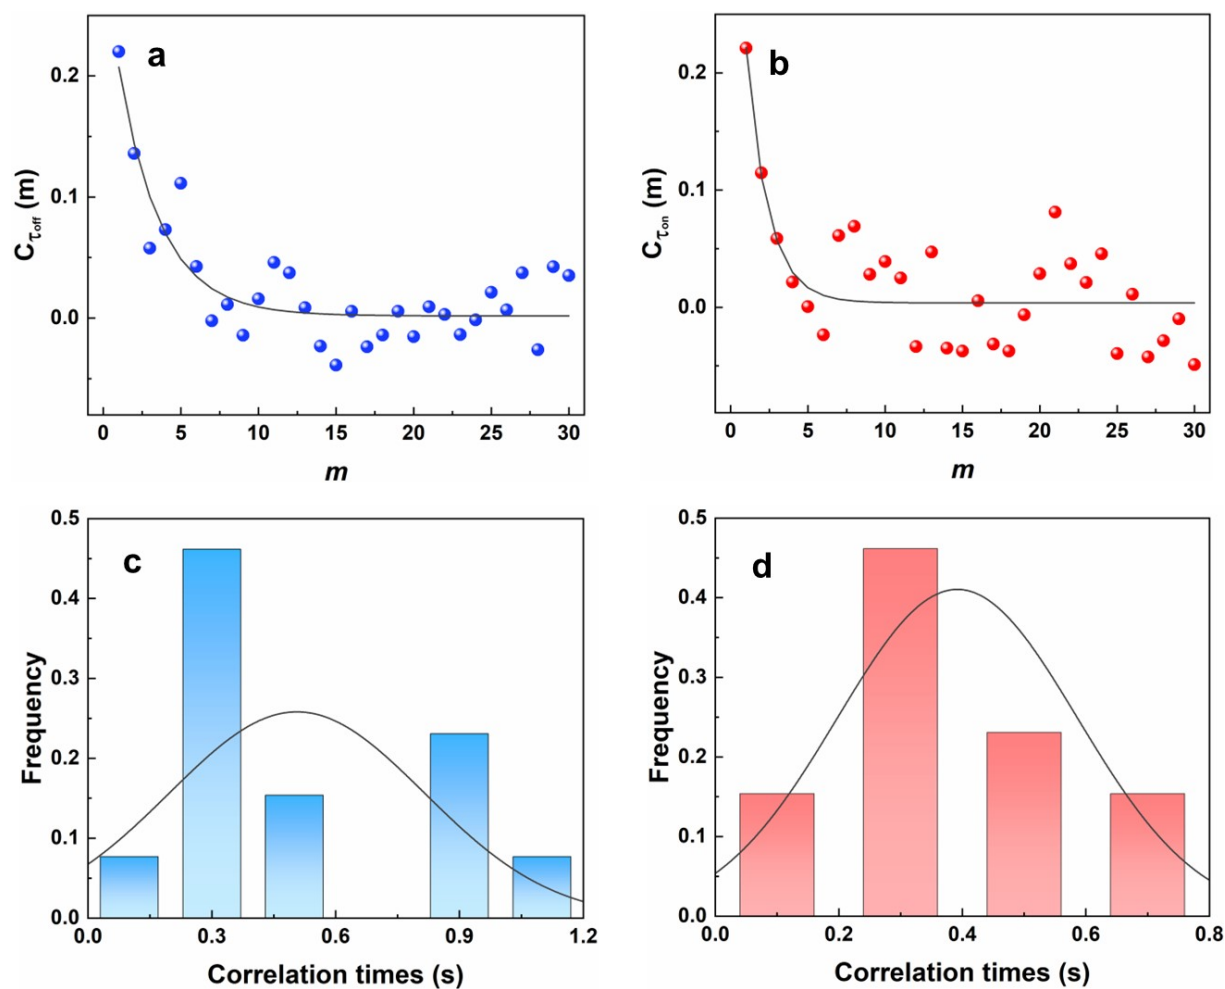

120

121 **Fig. S11** Autocorrelation functions of (a)  $\tau_{\text{off}}$  and (b)  $\tau_{\text{on}}$  reactions from the single-turnover  
 122 trajectory in **Fig. S10**. Histograms of correlation times of (c)  $\tau_{\text{off}}$  and (d)  $\tau_{\text{on}}$  reactions calculated  
 123 from numerous subregions ( $> 10$ ).

124



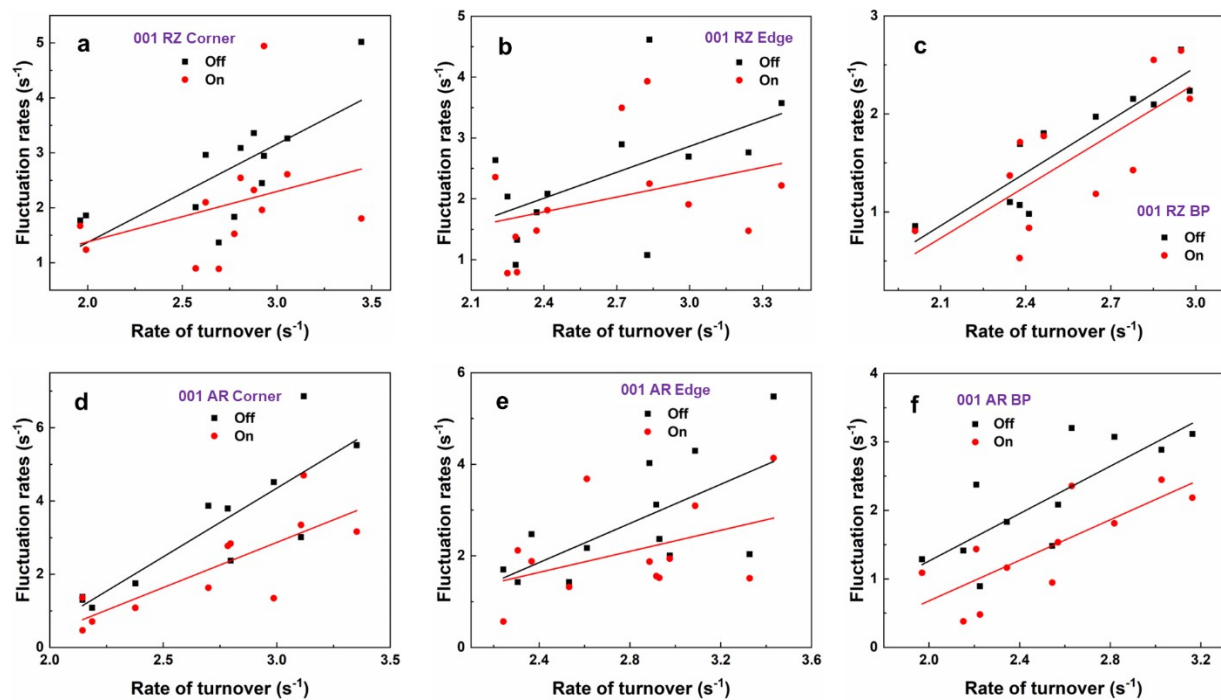

125

126 **Fig. S12** Dependence of photoreduction and photo-oxidation fluctuation rates on rate of turnovers  
 127 on (a,d) corners, (b,e) edges and (c,f) BPs of BiOBr-001.

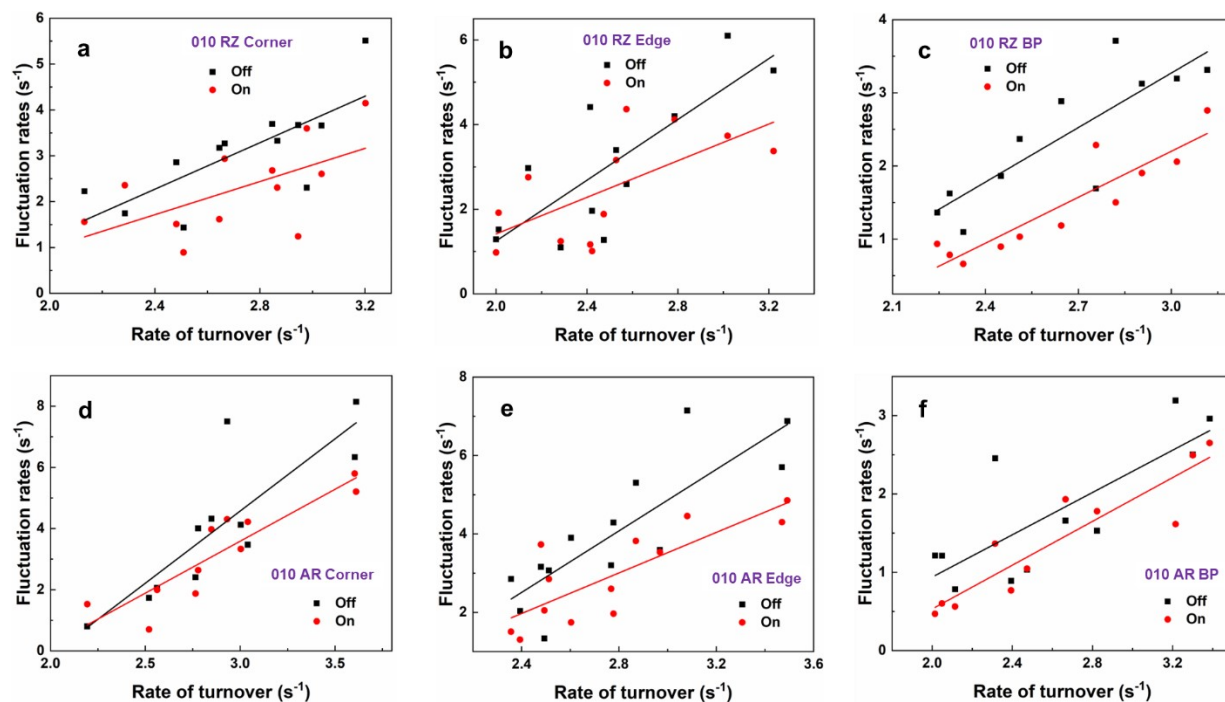

128

129 **Fig. S13** Dependence of photoreduction and photo-oxidation fluctuation rates on rate of turnovers  
 130 on (a,d) corners, (b,e) edges and (c,f) BPs of BiOBr-010.

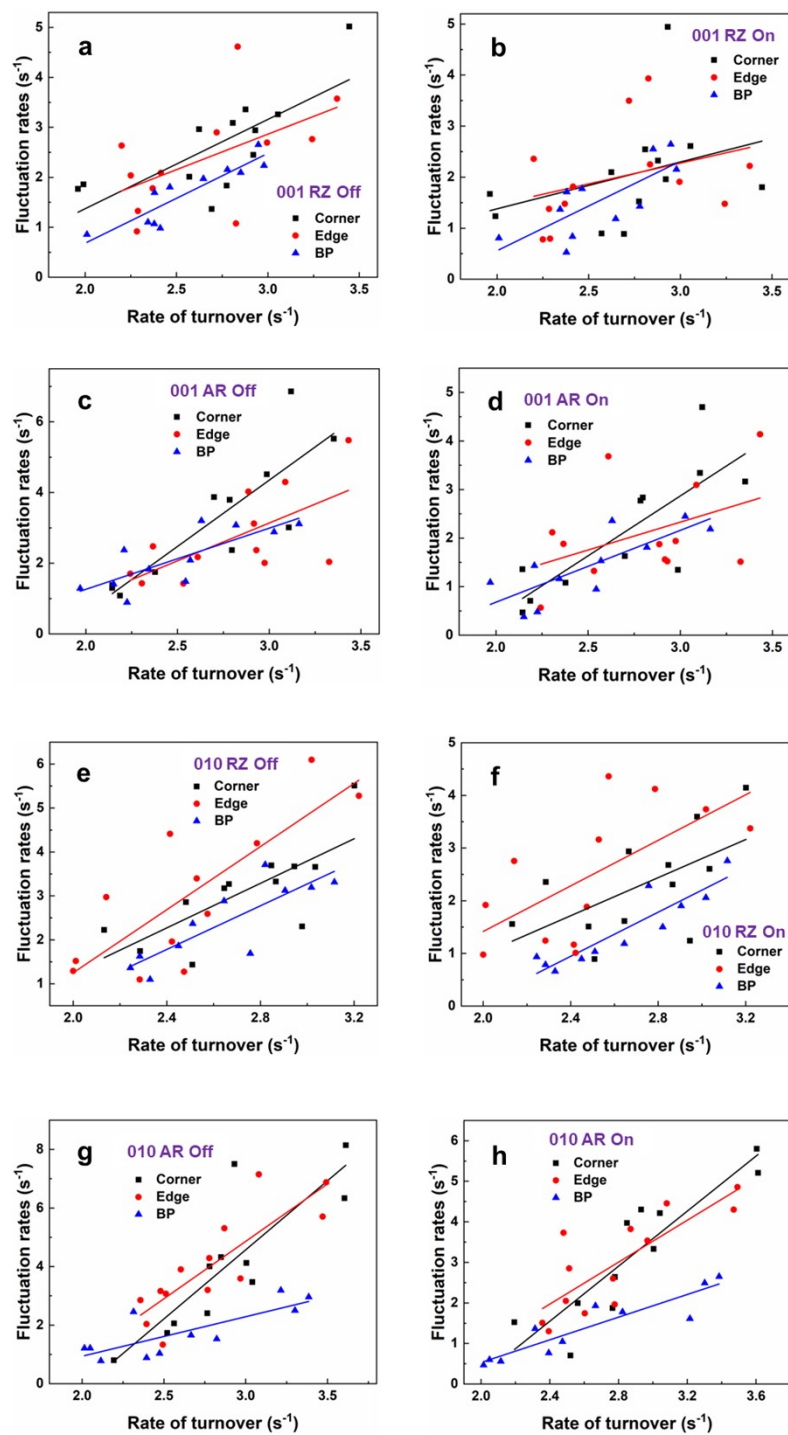

131

132 **Fig. S14** Dependence of  $\tau_{\text{off}}$  and  $\tau_{\text{on}}$  fluctuation rates on rate of turnovers for photoreduction  
 133 reactions on (a,b) BiOBr-001 and (e,f) BiOBr-010, and photo-oxidation reactions on (c,d) BiOBr-  
 134 001 and (g, h) BiOBr-010.

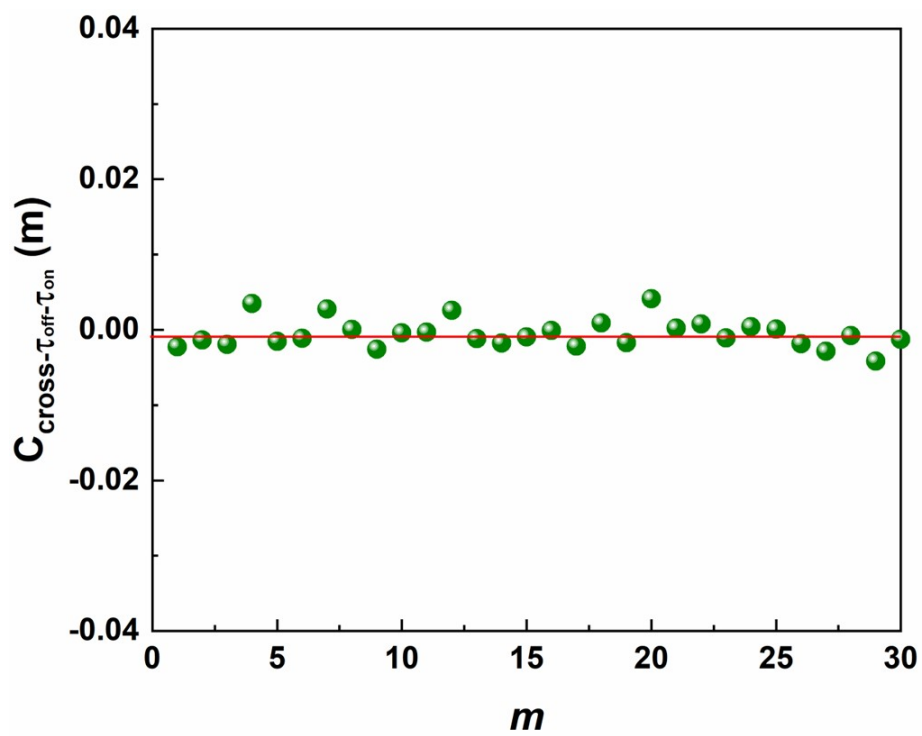

135

136 **Fig. S15** Cross correlation function of  $\tau_{\text{off}}$  and  $\tau_{\text{on}}$  obtained from the trajectory in **Fig. S10**.

137

138

**Table S1.** Quantification of photoreduction and photo-oxidation activities on corners, edges and BPs of BiOBr nanoplates.

| Positions  | Photoreduction activity ( $\text{s}^{-1} \mu\text{m}^{-2}$ ) | Photo-oxidation activity ( $\text{s}^{-1} \mu\text{m}^{-2}$ ) |
|------------|--------------------------------------------------------------|---------------------------------------------------------------|
| 001-Corner | $108.0 \pm 11.5$                                             | $654.5 \pm 83.2$                                              |
| 001-Edge   | $84.2 \pm 10.0$                                              | $480.6 \pm 63.5$                                              |
| 001-BP     | $3.4 \pm 0.7$                                                | $61.1 \pm 12.0$                                               |
| 010-Corner | $93.3 \pm 18.0$                                              | $191.3 \pm 35.3$                                              |
| 010-Edge   | $17.3 \pm 3.7$                                               | $88.3 \pm 19.4$                                               |
| 010-BP     | $3.0 \pm 0.4$                                                | $4.7 \pm 0.8$                                                 |

## Reference

1. M. Shen, T. Ding, W. H. Rackers, C. Tan, K. Mahmood, M. D. Lew and B. Sadtler, *J. Am. Chem. Soc.*, 2021, **143**, 11393-11403.
2. J. W. Ha, T. P. A. Ruberu, R. Han, B. Dong, J. Vela and N. Fang, *J. Am. Chem. Soc.*, 2014, **136**, 1398-1408.
3. T.-X. Huang, B. Dong, S. L. Filbrun, A. A. Okmi, X. Cheng, M. Yang, N. Mansour, S. Lei and N. Fang, *Sci. Adv.*, 2021, **7**, eabj4452.
4. B. Dong, Y. Pei, F. Zhao, T. W. Goh, Z. Qi, C. Xiao, K. Chen, W. Huang and N. Fang, *Nat. Catal.*, 2018, **1**, 135-140.
5. X. Zhou, W. Xu, G. Liu, D. Panda and P. Chen, *J. Am. Chem. Soc.*, 2010, **132**, 138-146.
